# Supplementary material for: Preoperative Prediction Nomogram Based on Integrated Profiling for Glioblastoma Multiforme in Glioma Patients
Source: PubMed Central journal article supplement (PMC7609958; doi:10.3389/fonc.2020.01750), 2020-10-21
Supplement: Data_Sheet_1.pdf [file Data_Sheet_1.pdf]

## Supplementary Material

### 1 Supplementary Figures and Tables

#### 1.1 Supplementary Figures

**Supplementary Figure 1.** The flow diagram for this study.

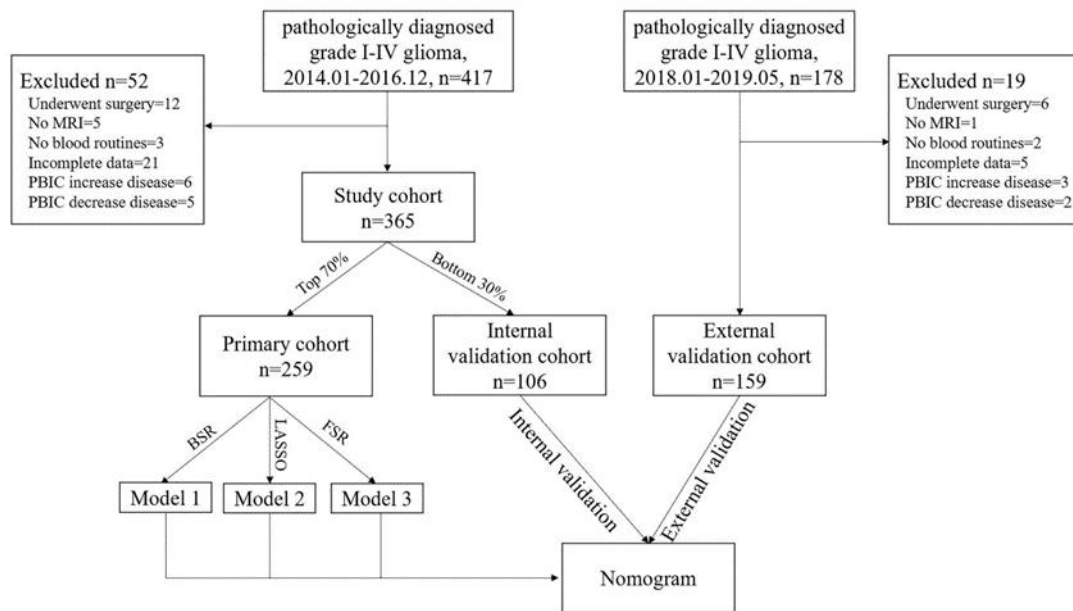

Abbreviations: PBIC, peripheral blood inflammatory cell; BSR, the best subsets regression; LASSO, the least absolute shrinkage and selection operator; FSR, the forward stepwise regression.

**Supplementary Figure 2.** A, the random forest variable importance measures. B, the selection variable by 10 times cross-validation. C, the ROC analysis for different method. Especially, the combination of selected variables based on increase in mean squared error in random forest was the same as the Lasso and the other combination for random forest was worse than Lasso according to ROC analysis.

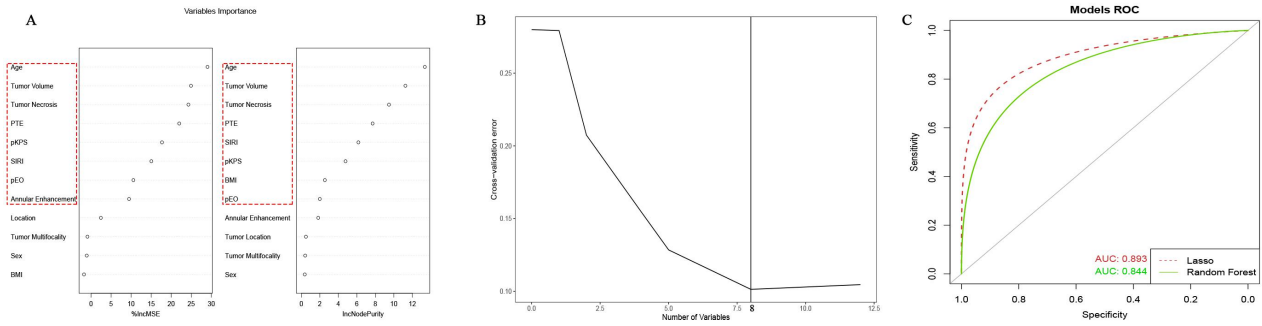

Abbreviations: BMI, body mass index; pKPS, preoperative Karnofsky performance status; pEO, preoperative epilepsy occurrence; SRI, systemic inflammation response index; PTE, peritumoral edema; %IncMSE: increase in mean squared error; IncNodePurity: increase in node purity.

**Supplementary Figure 3.** A, The linear relationship between all continuous independent variables and the logit transformation value of the dependent variable. The Box-Tidwell test showed  $P$  was 0.474 for age,  $P$  was 0.421 for SRI,  $P$  was 0.667 for tumor volume,  $P$  was 0.331 for PTE and  $P$  was 0.389 for Tumor necrosis volume, respectively. B, The Cook's distance for all observations. The

Cook's distance was no more than 0.02 which was calculated by  $\frac{4}{n-p-1}$ . C, The hat value for all observations. The two horizontal smooth dotted lines represented 2 and 3 times for the mean of hat value which was calculated using  $\frac{p}{n}$ . There were no high leverage cases due to all hat values were no more than 0.069. Especially,  $n$  referred to sample capacity and  $p$  referred to the number of independent variables.

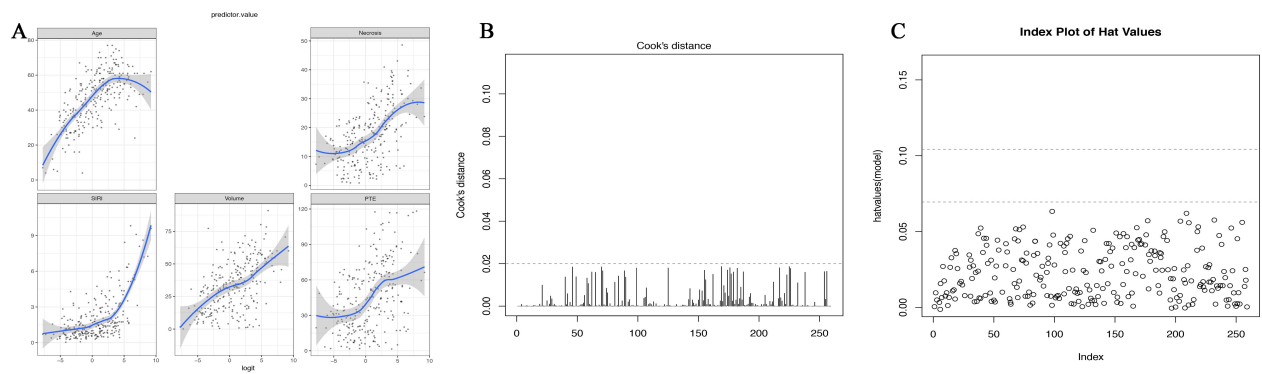

Abbreviations: SRI, systemic inflammation response index; PTE, peritumoral edema

**Supplementary Figure 4.** A, The Kaplan-Meier analysis for nomogram score in all grade gliomas ( $P=0.0015$ , with log-rank test). B, The time-dependent ROC analysis for all glioma patients. C, The Kaplan-Meier analysis for nomogram score in lower grade gliomas ( $P=0.013$ , with log-rank test). D,

The Kaplan-Meier analysis for nomogram score in glioblastoma multiforme ( $P=0.034$ , with log-rank test). Especially, the cut off values were calculated by X-tile.

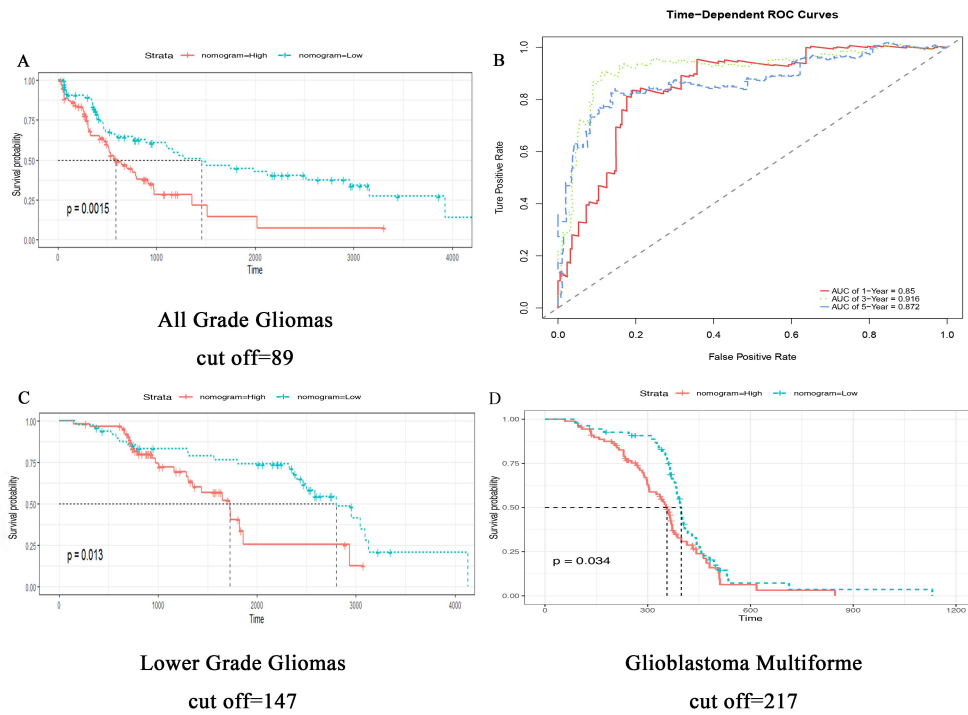

**Supplementary Figure 5.** The forest plot of multivariable Cox regression.

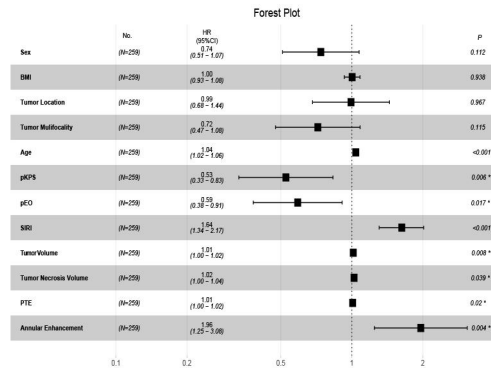

Abbreviations: BMI, body mass index; pKPS, preoperative Karnofsky performance status; pEO, preoperative epilepsy occurrence; SIRI, systemic inflammation response index; PTE, peritumoral edema.

**Supplementary Figure 6.** A, The Kaplan-Meier analysis of nomogram score in surgery plus radiation treatment group ( $P=0.041$ , with log-rank test). B, The Kaplan-Meier analysis of nomogram score in surgery plus TMZ treatment group ( $P=0.016$ , with log-rank test). C, The Kaplan-Meier analysis of nomogram score for LGG in surgery plus radiation and TMZ treatment group ( $P=0.002$ ,

with log-rank test). D, The Kaplan-Meier analysis of nomogram score for GBM in surgery plus radiation and TMZ treatment group ( $P=0.041$ , with log-rank test). Especially, the number of GBM patients was too few to analyze in in surgery plus radiation treatment group (No.=3) and in surgery plus TMZ treatment group (No.=7). The cut off values were calculated by X-tile.

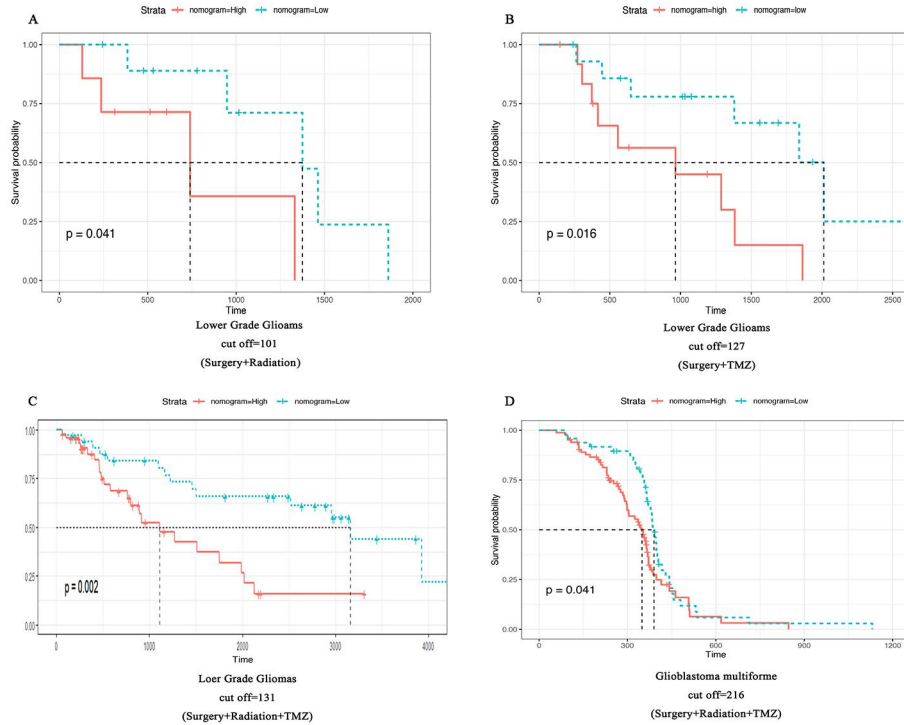

**Supplementary Figure 7.** A, The ROC analysis for nomogram and single predictor in primary cohort. B, The Calibration curves analysis for nomogram and single predictor in primary cohort.

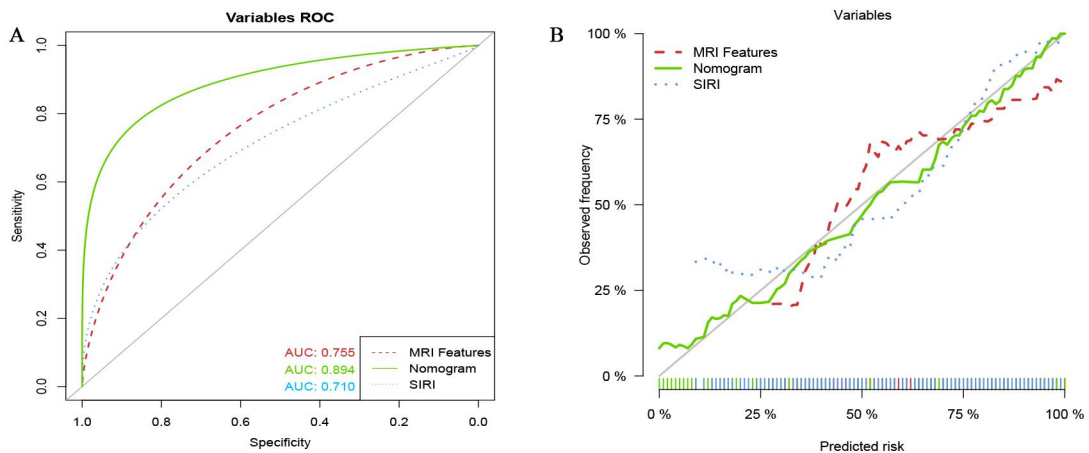

Abbreviations: SIRI, systemic inflammation response index.

## 1.2 Supplementary Tables

**Supplementary Table 1. Clinical Characteristics of Patients in the Primary and Validation Cohorts**

| Characteristics                             | LGG                    |                        |                        | <i>P</i> | GBM                    |                        |                        | <i>P</i> |
|---------------------------------------------|------------------------|------------------------|------------------------|----------|------------------------|------------------------|------------------------|----------|
|                                             | Primary                | Internal               | External               |          | Primary                | Internal               | External               |          |
|                                             | Cohort                 | Validation Cohort      | Validation Cohort      |          | Cohort                 | Validation Cohort      | Validation Cohort      |          |
| Sex                                         |                        |                        |                        | 0.713    |                        |                        |                        | 0.547    |
| Male                                        | 60 (51.7%)             | 27 (56.3%)             | 38 (48.7%)             |          | 79 (55.2%)             | 31 (53.4%)             | 50 (61.7%)             |          |
| Female                                      | 56 (48.3%)             | 21 (43.8%)             | 40 (51.3%)             |          | 64 (44.8%)             | 27 (46.6%)             | 31 (38.3%)             |          |
| Age, median (IQR), years                    | 37.50<br>(28.25-47.75) | 39.00<br>(31.50-50.50) | 39.00<br>(28.75-47.25) | 0.701    | 55.00<br>(49.00-61.00) | 56.00<br>(47.00-63.25) | 57.00<br>(53.00-62.00) | 0.373    |
| BMI, median (IQR), kg/m <sup>2</sup>        | 21.58<br>(19.97-23.42) | 22.36<br>(21.24-23.77) | 22.66<br>(21.30-23.69) | 0.646    | 22.01<br>(20.96-23.68) | 21.92<br>(20.65-23.97) | 22.48<br>(21.11-23.99) | 0.713    |
| pKPS                                        |                        |                        |                        | 0.436    |                        |                        |                        | 0.947    |
| <70                                         | 5 (4.3%)               | 1 (2.1%)               | 1 (1.3%)               |          | 73 (51.0%)             | 28 (48.3%)             | 40 (49.4%)             |          |
| ≥70                                         | 111 (95.7%)            | 47 (97.9%)             | 77 (98.7%)             |          | 70 (49.0%)             | 30 (51.7%)             | 41 (50.6%)             |          |
| pEO                                         |                        |                        |                        | 0.993    |                        |                        |                        | 0.255    |
| Yes                                         | 60 (51.7%)             | 25 (52.1%)             | 41 (52.6%)             |          | 28 (19.6%)             | 11 (19.0%)             | 23 (28.4%)             |          |
| No                                          | 56 (48.3%)             | 23 (47.9%)             | 37 (47.4%)             |          | 115 (80.4%)            | 47 (81.0%)             | 58 (71.6%)             |          |
| SIRI, median (IQR)                          | 0.92<br>(0.56-1.50)    | 0.89<br>(0.54-1.31)    | 0.76<br>(0.52-1.19)    | 0.297    | 1.80<br>(1.18-2.36)    | 1.33<br>(1.05-2.22)    | 1.63<br>(1.07-2.57)    | 0.311    |
| Tumor volume, median (IQR), cm <sup>3</sup> | 23.22<br>(11.60-31.17) | 21.78<br>(12.15-32.01) | 22.44<br>(12.65-31.96) | 0.142    | 47.89<br>(28.48-59.31) | 46.12<br>(27.66-58.89) | 47.34<br>(28.17-58.92) | 0.224    |
| Tumor location                              |                        |                        |                        | 0.337    |                        |                        |                        | 0.431    |
| Supratentorial                              | 64 (55.2%)             | 26 (54.2%)             | 41 (52.6%)             |          | 74 (51.7%)             | 31 (53.4%)             | 44 (54.3%)             |          |
| Infratentorial                              | 52 (44.8%)             | 22 (45.8%)             | 37 (47.4%)             |          | 69 (48.3%)             | 27 (46.6%)             | 37 (45.7%)             |          |

|                                                      |                        |                        |                        |       |                        |                        |                        |       |
|------------------------------------------------------|------------------------|------------------------|------------------------|-------|------------------------|------------------------|------------------------|-------|
| Tumor multifocality                                  |                        |                        |                        | 0.823 |                        |                        |                        | 0.469 |
| Yes                                                  | 6 (5.2%)               | 3 (6.3%)               | 3 (3.8%)               |       | 44 (30.8%)             | 23 (39.7%)             | 26 (32.1%)             |       |
| No                                                   | 110 (94.8%)            | 45 (93.8%)             | 75 (96.2%)             |       | 99 (69.2%)             | 35 (60.3%)             | 55 (67.9%)             |       |
| Annular enhancement                                  |                        |                        |                        | 0.947 |                        |                        |                        | 0.803 |
| Yes                                                  | 56 (48.3%)             | 22 (45.8%)             | 38 (48.7%)             |       | 119 (83.2%)            | 46 (79.3%)             | 66 (81.5%)             |       |
| No                                                   | 60 (51.7%)             | 26 (54.2%)             | 40 (51.3%)             |       | 24 (16.8%)             | 12 (20.7%)             | 15 (18.5%)             |       |
| Tumor necrosis volume, median (IQR), cm <sup>3</sup> | 12.75<br>(8.18-18.06)  | 11.48<br>(8.53-17.79)  | 12.11<br>(8.07-18.37)  | 0.198 | 20.65<br>(12.25-29.20) | 19.88<br>(12.04-29.16) | 20.77<br>(13.03-29.98) | 0.379 |
| PTE, median (IQR), cm <sup>3</sup>                   | 31.08<br>(18.03-47.97) | 30.61<br>(18.28-48.12) | 31.33<br>(17.91-47.72) | 0.267 | 52.97<br>(24.81-76.04) | 53.18<br>(24.78-75.61) | 52.22<br>(23.65-76.28) | 0.188 |

IQR, interquartile range; BMI, body mass index; pKPS, preoperative Karnofsky performance status; pEO, preoperative epilepsy occurrence; LGG, lower grade glioma; GBM, glioblastoma multiforme; SIRI, systemic inflammation response index; PTE, peritumoral edema; *P* was obtained from the Kruskal-Wallis H test and the  $\chi^2$  test.

**Supplementary Table 2. Selected Variables in the Primary and Validation Cohorts**

| Selected Variables       | Primary Cohort         |                        | <i>P</i> | Internal Validation Cohort |                        | <i>P</i> | External Validation Cohort |                        | <i>P</i> |
|--------------------------|------------------------|------------------------|----------|----------------------------|------------------------|----------|----------------------------|------------------------|----------|
|                          | LGG                    | GBM                    |          | LGG                        | GBM                    |          | LGG                        | GBM                    |          |
| Age, median (IQR), years | 37.50<br>(28.25-47.75) | 55.00<br>(49.00-61.00) | <0.01    | 39.00<br>(31.50-50.50)     | 56.00<br>(47.00-63.25) | <0.01    | 39.00<br>(28.75-47.25)     | 57.00<br>(53.00-62.00) | <0.01    |
| pKPS                     |                        |                        | <0.01    |                            |                        | <0.01    |                            |                        | <0.01    |
| <70                      | 5 (4.3)                | 73 (51.0)              |          | 1 (2.1)                    | 28 (48.3)              |          | 1 (1.3)                    | 40 (49.4)              |          |
| ≥70                      | 111 (95.7)             | 70 (49.0)              |          | 47 (97.9)                  | 30 (51.7)              |          | 77 (98.7)                  | 41 (50.6)              |          |
| pEO                      |                        |                        | <0.01    |                            |                        | <0.01    |                            |                        | <0.01    |
| Yes                      | 60 (51.7)              | 28 (19.6)              |          | 25 (52.1)                  | 11 (19.0)              |          | 41 (52.6)                  | 23 (28.4)              |          |
| No                       | 56 (48.3)              | 115 (80.4)             |          | 23 (47.9)                  | 47 (81.0)              |          | 37 (47.4)                  | 58 (71.6)              |          |
| SIRI, median (IQR)       | 0.92                   | 1.80                   | <0.01    | 0.89                       | 1.33                   | <0.01    | 0.76                       | 1.63                   | <0.01    |

|                                                      | (0.56-1.50)            | (1.18-2.36)            | (0.54-1.31) | (1.05-2.22)            | (0.52-1.19)            | (1.07-2.57) |                        |                        |       |
|------------------------------------------------------|------------------------|------------------------|-------------|------------------------|------------------------|-------------|------------------------|------------------------|-------|
| Tumor volume, median (IQR), cm <sup>3</sup>          | 23.22<br>(11.60-31.17) | 47.89<br>(28.48-59.31) | <0.01       | 21.78<br>(12.15-32.01) | 46.12<br>(27.66-58.89) | <0.01       | 22.44<br>(12.65-31.96) | 47.34<br>(28.17-58.92) | <0.01 |
| Tumor necrosis volume, median (IQR), cm <sup>3</sup> | 12.75<br>(8.18-18.06)  | 20.65<br>(12.25-29.20) | <0.05       | 11.48<br>(8.53-17.79)  | 19.88<br>(12.04-29.16) | <0.05       | 12.11<br>(8.07-18.37)  | 20.77<br>(13.03-29.98) | <0.05 |
| Annular enhancement                                  |                        |                        | <0.01       |                        |                        | <0.01       |                        |                        | <0.01 |
| Yes                                                  | 56 (48.3%)             | 119 (83.2%)            |             | 22 (45.8%)             | 46 (79.3%)             |             | 38 (48.7%)             | 66 (81.5%)             |       |
| No                                                   | 60 (51.7%)             | 24 (16.8%)             |             | 26 (54.2%)             | 12 (20.7%)             |             | 40 (51.3%)             | 15 (18.5%)             |       |
| PTE, median (IQR), cm <sup>3</sup>                   | 31.08<br>(18.03-47.97) | 52.97<br>(24.81-76.04) | <0.01       | 30.61<br>(18.28-48.12) | 53.18<br>(24.78-75.61) | <0.01       | 31.33<br>(17.91-47.72) | 52.22<br>(23.65-76.28) | <0.01 |

LGG, lower grade glioma; GBM, glioblastoma multiforme; IQR, interquartile range; pKPS, preoperative Karnofsky performance status; pEO, preoperative epilepsy occurrence; SIRI, systemic inflammation response index; PTE, peritumoral edema; *P* was obtained from the Kruskal-Wallis H test and the  $\chi^2$  test.

### Supplementary Table 3. Risk Factors for GBM in Primary Cohort

| Variable     | Models  |                     |          |
|--------------|---------|---------------------|----------|
|              | $\beta$ | OR (95% CI)         | <i>P</i> |
| Age          | 0.99    | 1.10<br>(1.08-1.13) | <0.01    |
| pKPS         | -3.01   | 0.05<br>(0.02-0.12) | <0.01    |
| pEO          | -1.19   | 0.30<br>(0.16-0.58) | <0.01    |
| SIRI         | 0.73    | 2.08<br>(1.60-2.71) | <0.01    |
| Tumor volume | 0.07    | 1.07<br>(1.05-1.09) | <0.01    |

|                       |      |                     |       |
|-----------------------|------|---------------------|-------|
| Annular enhancement   | 1.67 | 5.31<br>(3.00-9.39) | <0.01 |
| PTE                   | 0.03 | 1.03<br>(1.02-1.04) | <0.01 |
| Tumor necrosis volume | 0.10 | 1.11<br>(1.07-1.15) | <0.01 |

pKPS, preoperative Karnofsky performance status; pEO, preoperative epilepsy occurrence; SIRI, systemic inflammation response index; PTE, peritumoral edema; *P* was obtained from the univariable logistic regression;  $\beta$  was regression coefficient; OR, odds ratio.

**Supplementary Table 4. The random forest variable importance measures**

| variable              | %IncMSE  | IncNodePurity |
|-----------------------|----------|---------------|
| Age                   | 0.058267 | 13.62311      |
| Tumor Necrosis Volume | 0.051204 | 10.04949      |
| Tumor Volume          | 0.045594 | 10.96671      |
| PTE                   | 0.033531 | 7.658929      |
| pKPS                  | 0.023878 | 4.157103      |
| SIRI                  | 0.019902 | 6.140776      |
| pEO                   | 0.00989  | 2.13419       |
| Annular Enhancement   | 0.007508 | 1.700399      |
| Tumor Multifocality   | 0.000538 | 0.383942      |
| Tumor Location        | 0.000335 | 0.486894      |
| Sex                   | 0.000173 | 0.335287      |
| BMI                   | -0.00174 | 2.727991      |



Abbreviations: BMI, body mass index; pKPS, preoperative Karnofsky performance status; pEO, preoperative epilepsy occurrence; SIRI, systemic inflammation response index; PTE, peritumoral edema; %IncMSE: increase in mean squared error; IncNodePurity: increase in node purity.

### 1.3 Supplementary materials and methods

The peritumoral edema, volume and cystic necrosis of tumors were calculated by the following formulas [25]:

- cuboid:  $V = a \times b \times c$  (total axes measured)
- (tri-axial) ellipsoid:  $V = \frac{4}{3} \times \pi \times a \times b \times c$  (semi-axes measured;  $a > b > c$ )  
 equivalent to  $V = \pi \times a \times b \times c \div 6$
- oblate spheroid:  $V = \frac{4}{3} \times \pi \times a^2 \times b$  (semi-axes measured;  $a = b > c$ ) or
- prolate spheroid:  $V = \frac{4}{3} \times \pi \times a \times b^2$  (semi-axes measured;  $a = b < c$ )
- sphere:  $V = \frac{4}{3} \times \pi \times r^3$  (semi-axes measured;  $a = b = c$ )
